# Supplementary material
Source: PubMed Central journal article supplement (PMC8808790)
Supplement: Supplement.pdf [file Supplement.pdf]

# Safety of Intra-articular Hyaluronic Acid for Knee Osteoarthritis: Systematic Review and Meta-analysis of Randomized Trials Involving Over 8,000 Patients

## Supplement

**Supplement Table 1. Medline Search Strategy.**

|                                          |
|------------------------------------------|
| <b>Study Design Search Terms</b>         |
| 1. Clinical Trial, pt                    |
| 2. Clinical Trial, Phase I, pt           |
| 3. Clinical Trial, Phase II, pt          |
| 4. Clinical Trial, Phase III, pt         |
| 5. Clinical Trial, Phase IV, pt          |
| 6. Controlled Clinical Trial, pt         |
| 7. Multicenter Study, pt                 |
| 8. Randomized Controlled Trial, pt       |
| 9. random*, ti, ab                       |
| 10. placebo*, ti, ab                     |
| 11. sham*, ti, ab                        |
| 12. control*, ti, ab                     |
| 13. saline*, ab                          |
|                                          |
| <b>Diagnosis Search Terms</b>            |
| 14. osteoarthriti*, ti, ab               |
| 15. osteoarthro*, ti, ab                 |
| 16. gonarthriti*, ti, ab                 |
| 17. gonarthro*, ti, ab                   |
| 18. arthriti*, ti, ab                    |
| 19. arthro*, ti, ab                      |
| 20. osteoarthritis, majr                 |
|                                          |
| <b>Diagnosis Location Search Term</b>    |
| 21. knee*, mp                            |
|                                          |
| <b>Viscosupplementation Search Terms</b> |
| 22. adant*, mp                           |
| 23. arthrum*, mp                         |
| 24. artz*, mp                            |
| 25. biohy*, mp                           |
| 26. durolane*, mp                        |
| 27. euflexxa*, mp                        |
| 28. gel-one*, mp                         |
| 29. go-on*, mp                           |
| 30. healon*, mp                          |
| 31.hya-ject*, mp                         |
| 32. hyalectin*, mp                       |
| 33. hyalgan*, mp                         |
| 34. hyaluron*, mp                        |
| 35. hylan*, mp                           |

|                          |
|--------------------------|
| 36. hylastan*, mp        |
| 37. hymovis*, mp         |
| 38. kartilage*, mp       |
| 39. monovisc*, mp        |
| 40. nrd101*, mp          |
| 41. nuflexxa*, mp        |
| 42. orthovisc*, mp       |
| 43. ostenil*. mp         |
| 44. supartz*. mp         |
| 45. suplasyn*, mp        |
| 46. synvisc*, mp         |
| 47. viscosupplement*, mp |
|                          |
| <b>Combination Terms</b> |
| 48. or/1-13              |
| 49. or/14-20             |
| 50. or/21                |
| 51. or/22-47             |
| 52. and/48-51            |

**Supplement Table 2. Excluded Randomized Controlled Trials of Hyaluronic Acid Injection for Knee Osteoarthritis.**

| <b>Study</b>                      | <b>Primary reason for exclusion</b>                   |
|-----------------------------------|-------------------------------------------------------|
| Adams, 1995 <sup>1</sup>          | No intra-articular injection in control group         |
| Ahmad, 2018 <sup>2</sup>          | Active control group (platelet-rich plasma injection) |
| Ardic, 2001 <sup>3</sup>          | Sample size less than 30 in any group                 |
| Askari, 2016 <sup>4</sup>         | Active control group (corticosteroid injection)       |
| Atamaz, 2006 <sup>5</sup>         | Sample size less than 30 in any group                 |
| Atay, 2008 <sup>6</sup>           | Patients underwent knee surgery                       |
| Auerbach, 2002 <sup>7</sup>       | Active control group (gaseous oxygen injection)       |
| Bao, 2018 <sup>8</sup>            | Sample size less than 30 in any group                 |
| Bayramoğlu, 2003 <sup>9</sup>     | Sample size less than 30 in any group                 |
| Bellamy, 2005a <sup>10</sup>      | Redundant with Reynauld (2002)                        |
| Bellamy, 2005b <sup>11</sup>      | Redundant with Reynauld (2002)                        |
| Berenbaum, 2012 <sup>12</sup>     | Active control group (HA injection)                   |
| Bisicchia, 2016 <sup>13</sup>     | Active control group (corticosteroid injection)       |
| Blanco, 2008 <sup>14</sup>        | Sample size less than 30 in any group                 |
| Bragantini, 1987 <sup>15</sup>    | Sample size less than 30 in any group                 |
| Buendia-Lopez, 2018 <sup>16</sup> | Active control group (platelet-rich plasma injection) |
| Bunyaratavej, 2001 <sup>17</sup>  | Sample size less than 30 in any group                 |
| Butun, 2002 <sup>18</sup>         | Sample size less than 30 in any group                 |
| Caborn, 2004 <sup>19</sup>        | Active control group (corticosteroid injection)       |
| Campos, 2017 <sup>20</sup>        | Active control group (corticosteroid injection)       |
| Caracuel, 2001 <sup>21</sup>      | Sample size less than 30 in any group                 |
| Carrabba, 1995 <sup>22</sup>      | Sample size less than 30 in any group                 |
| Chou, 2009 <sup>23</sup>          | Active control group (HA injection)                   |
| Cogalgil, 2002 <sup>24</sup>      | Sample size less than 30 in any group                 |
| Cohen, 1994 <sup>25</sup>         | Sample size less than 30 in any group                 |
| Cole, 2017 <sup>26</sup>          | Active control group (platelet-rich plasma injection) |
| Conrozier, 2009 <sup>27</sup>     | Sample size less than 30 in any group                 |
| Conrozier, 2016 <sup>28</sup>     | Active control group (HA injection)                   |
| Corrado, 1995 <sup>29</sup>       | Sample size less than 30 in any group                 |
| Creamer, 1994 <sup>30</sup>       | Sample size less than 30 in any group                 |
| Çubukçu, 2005 <sup>31</sup>       | Sample size less than 30 in any group                 |
| Dahlberg, 1994 <sup>32</sup>      | Sample size less than 30 in any group                 |
| Dallari, 2018 <sup>33</sup>       | Active control group (polynucleotide injection)       |
| DeCaria, 2012 <sup>34</sup>       | Sample size less than 30 in any group                 |
| Di Martino, 2016 <sup>35</sup>    | Patients underwent knee surgery                       |
| Dickson, 2001 <sup>36</sup>       | Active control group (corticosteroid injection)       |
| Diracoglu, 2009 <sup>37</sup>     | Sample size less than 30 in any group                 |
| Ertürk, 2016 <sup>38</sup>        | Active control group (HA injection)                   |
| Estades-Rubio, 2017 <sup>39</sup> | Active control group (HA injection)                   |
| Filardo, 2016 <sup>40</sup>       | Patients underwent knee surgery                       |
| Forster, 2003 <sup>41</sup>       | Patients underwent knee surgery                       |
| Frizziero, 2002 <sup>42</sup>     | Active control group (corticosteroid injection)       |
| Ghirardini, 1990 <sup>43</sup>    | Sample size less than 30 in any group                 |
| Gigis, 2016 <sup>44</sup>         | Active control group (HA injection)                   |
| Giarratana, 2014 <sup>45</sup>    | Active control group (polynucleotide injection)       |

|                                     |                                                                  |
|-------------------------------------|------------------------------------------------------------------|
| Graf, 1993 <sup>46</sup>            | Active control group (mucopolysaccharide polysulphate injection) |
| Grecomoro, 1987 <sup>47</sup>       | Sample size less than 30 in any group                            |
| Groppa, 2001 <sup>48</sup>          | Sample size less than 30 in any group                            |
| Guler, 1996 <sup>49</sup>           | Sample size less than 30 in any group                            |
| Guo, 2018 <sup>50</sup>             | Active control group (HA injection)                              |
| Heybeli, 2008 <sup>51</sup>         | Patients underwent knee surgery                                  |
| Hizmetli, 2002 <sup>52</sup>        | Sample size less than 30 in any group                            |
| Houseman, 2014 <sup>53</sup>        | Active control group (corticosteroid injection)                  |
| Huang, 2005 <sup>54</sup>           | No intra-articular injection in control group                    |
| Ishijima, 2014 <sup>55</sup>        | No intra-articular injection in control group                    |
| Jones, 1995 <sup>56</sup>           | Active control group (corticosteroid injection)                  |
| Jubb, 2003 <sup>57</sup>            | Patients underwent multiple treatment cycles                     |
| Jüni, 2007 <sup>58</sup>            | Active control group (HA injection)                              |
| Kahan, 2003 <sup>59</sup>           | No intra-articular injection in control group                    |
| Kalay, 1997 <sup>60</sup>           | Sample size less than 30 in any group                            |
| Kalman, 2008 <sup>61</sup>          | Oral supplementation                                             |
| Kaplunov, 2015 <sup>62</sup>        | No relevant outcomes reported                                    |
| Karatosun, 2005 <sup>63</sup>       | Active control group (HA injection)                              |
| Karatosun, 2006 <sup>64</sup>       | No intra-articular injection in control group                    |
| Kawasaki, 2009 <sup>65</sup>        | No intra-articular injection in control group                    |
| Khanasuk, 2012 <sup>66</sup>        | Sample size less than 30 in any group                            |
| Kianmehr, 2018 <sup>67</sup>        | Active control group (HA injection)                              |
| Kirchner, 2006 <sup>68</sup>        | Active control group (HA injection)                              |
| Kotevoglou, 2006 <sup>69</sup>      | Sample size less than 30 in any group                            |
| Kul-Panza, 2010 <sup>70</sup>       | Sample size less than 30 in any group                            |
| Lamo-Espinosa, 2016 <sup>71</sup>   | Active control group (mesenchymal stromal cell injection)        |
| Lamo-Espinosa, 2018 <sup>72</sup>   | Active control group (mesenchymal stromal cell injection)        |
| Leardini, 1987 <sup>73</sup>        | Sample size less than 30 in any group                            |
| Leardini, 1991 <sup>74</sup>        | Sample size less than 30 in any group                            |
| Leighton, 2014 <sup>75</sup>        | Active control group (corticosteroid injection)                  |
| Leopold, 2003 <sup>76</sup>         | Active control group (corticosteroid injection)                  |
| Lisi, 2018 <sup>77</sup>            | Active control group (platelet-rich plasma injection)            |
| Listrat, 1997 <sup>78</sup>         | Patients underwent knee surgery                                  |
| Louis, 2018 <sup>79</sup>           | Active control group (platelet-rich plasma injection)            |
| McDonald, 2000 <sup>80</sup>        | Active control group (HA injection)                              |
| Miltner, 2002 <sup>81</sup>         | Within-patient control                                           |
| Navarro-Sarabia, 2011 <sup>82</sup> | Patients underwent multiple treatment cycles                     |
| Ozturk, 2006 <sup>83</sup>          | Sample size less than 30 in any group                            |
| Pavelka, 2011 <sup>84</sup>         | Active control group (HA injection)                              |
| Payne, 2000 <sup>85</sup>           | Sample size less than 30 in any group                            |
| Pedersen, 1993 <sup>86</sup>        | Sample size less than 30 in any group                            |
| Petrella, 2009 <sup>87</sup>        | Sample size less than 30 in any group                            |
| Pham, 2004 <sup>88</sup>            | Active control group (corticosteroid injection)                  |
| Raeissadat, 2018 <sup>89</sup>      | Active control group (ozone injection)                           |
| Raman, 2008 <sup>90</sup>           | Active control group (HA injection)                              |
| Raynauld, 2002 <sup>91</sup>        | No intra-articular injection in control group                    |
| Raynauld, 2005 <sup>92</sup>        | No intra-articular injection in control group                    |
| Renklitepe, 2000 <sup>93</sup>      | Sample size less than 30 in any group                            |

|                                         |                                                       |
|-----------------------------------------|-------------------------------------------------------|
| Román, 2000 <sup>94</sup>               | Sample size less than 30 in any group                 |
| Sala, 1995 <sup>95</sup>                | Sample size less than 30 in any group                 |
| Sanofi, 2009 <sup>96</sup>              | Sample size less than 30 in any group                 |
| Scale, 1994 <sup>97</sup>               | Sample size less than 30 in any group                 |
| Schauss, 2012 <sup>98</sup>             | Oral supplementation                                  |
| Schneider, 1997 <sup>99</sup>           | Sample size less than 30 in any group                 |
| Seikagaku Corp., 2011 <sup>100</sup>    | Redundant with Strand (2012)                          |
| Sezgin, 2005 <sup>101</sup>             | Sample size less than 30 in any group                 |
| Shimizu, 2010 <sup>102</sup>            | Sample size less than 30 in any group                 |
| Skwara, 2009 <sup>103</sup>             | Sample size less than 30 in any group                 |
| Skwara, 2009 <sup>104</sup>             | Active control group (corticosteroid injection)       |
| Strand, 2016 <sup>105</sup>             | Redundant with Strand (2012)                          |
| Su, 2018 <sup>106</sup>                 | Active control group (platelet-rich plasma injection) |
| Sun, 2017 <sup>107</sup>                | Active control group (HA injection)                   |
| Suppan, 2017 <sup>108</sup>             | Active control group (HA injection)                   |
| Tamir, 2001 <sup>109</sup>              | Sample size less than 30 in any group                 |
| Tammachote, 2016 <sup>110</sup>         | Active control group (corticosteroid injection)       |
| Tasciotaoglu, 2003 <sup>111</sup>       | Active control group (corticosteroid injection)       |
| Tekeoglu, 1998 <sup>112</sup>           | Sample size less than 30 in any group                 |
| Tetik, 2003 <sup>113</sup>              | No intra-articular injection in control group         |
| Toda, 2008 <sup>114</sup>               | Sample size less than 30 in any group                 |
| Torrance, 2002 <sup>115</sup>           | Redundant with Reynauld (2002)                        |
| Trueba Vasavilbaso, 2017 <sup>116</sup> | Patients underwent knee surgery                       |
| Tsai, 2003 <sup>117</sup>               | No relevant outcomes reported                         |
| Vaishya, 2017 <sup>118</sup>            | Active control group (corticosteroid injection)       |
| Wang, 2018 <sup>119</sup>               | Active control group (HA injection)                   |
| Wang, 2018 <sup>120</sup>               | Sample size less than 30 in any group                 |
| Westrich, 2009 <sup>121</sup>           | Patients underwent knee surgery                       |
| Wu, 2004 <sup>122</sup>                 | No relevant outcomes reported                         |
| Xin, 2016 <sup>123</sup>                | Active control group (HA injection)                   |
| Yu, 2018 <sup>124</sup>                 | No relevant outcomes reported                         |

**Supplement Table 3. Sensitivity Analysis of One-Study Removed Safety Results of Intra-articular Hyaluronic Acid for Knee Osteoarthritis.**

| Event                   | No. Influential Studies <sup>a</sup> | Minimum RR <sup>b</sup> |            |      | Maximum RR <sup>b</sup> |            |        |
|-------------------------|--------------------------------------|-------------------------|------------|------|-------------------------|------------|--------|
|                         |                                      | RR                      | 95% CI     | P    | RR                      | 95% CI     | P      |
| <b>Adverse event</b>    |                                      |                         |            |      |                         |            |        |
| Any                     | 0                                    | 1.00                    | 0.95, 1.06 | 0.88 | 1.03                    | 0.97, 1.08 | 0.38   |
| Local                   | 0                                    | 1.18                    | 1.04, 1.34 | 0.01 | 1.28                    | 1.11, 1.48 | <0.001 |
| Serious                 | 0                                    | 1.35                    | 0.83, 2.18 | 0.22 | 1.53                    | 0.97, 2.42 | 0.07   |
| <b>Study withdrawal</b> |                                      |                         |            |      |                         |            |        |
| Any                     | 0                                    | 0.95                    | 0.83, 1.10 | 0.52 | 1.00                    | 0.88, 1.14 | >0.99  |
| Adverse event-related   | 2 (9%)                               | 1.27                    | 0.88, 1.84 | 0.20 | 1.59                    | 1.07, 2.37 | 0.02   |

<sup>a</sup>Indicates the number of studies in which removal of that study altered meta-analysis conclusions.

<sup>b</sup>Data derived from a one-study removed sensitivity analysis in which we iteratively removed one study at a time to determine whether conclusions were influenced by any single study. The minimum and maximum risk ratios (RR) demarcate the range of values derived from the analysis of each outcome. A RR>1 indicates higher risk with intra-articular hyaluronic acid. A RR<1 indicates lower risk with intra-articular hyaluronic acid.

**Supplement Table 4. Sensitivity Analysis of Fixed-Effect versus Random Effects Meta-analysis Models.**

| Event                   | Heterogeneity<br>(I <sup>2</sup> ) | Fixed-Effect    |            |       | Random Effects  |            |       |
|-------------------------|------------------------------------|-----------------|------------|-------|-----------------|------------|-------|
|                         |                                    | RR <sup>a</sup> | 95% CI     | P     | RR <sup>a</sup> | 95% CI     | P     |
| <b>Adverse event</b>    |                                    |                 |            |       |                 |            |       |
| Any                     | 0%                                 | 1.01            | 0.96, 1.07 | 0.61  | 1.01            | 0.96, 1.07 | 0.61  |
| Local                   | 9%                                 | 1.21            | 1.07, 1.36 | 0.003 | 1.23            | 1.07, 1.41 | 0.003 |
| Serious                 | 0%                                 | 1.44            | 0.91, 2.26 | 0.12  | 1.44            | 0.91, 2.26 | 0.12  |
| <b>Study withdrawal</b> |                                    |                 |            |       |                 |            |       |
| Any                     | 0%                                 | 0.99            | 0.87, 1.12 | 0.83  | 0.99            | 0.87, 1.12 | 0.83  |
| Adverse event-related   | 0%                                 | 1.37            | 0.97, 1.93 | 0.08  | 1.37            | 0.97, 1.93 | 0.08  |

<sup>a</sup>A risk ratio (RR) >1 indicates higher risk with intra-articular hyaluronic acid. A RR<1 indicates lower risk with intra-articular hyaluronic acid.

## Supplement References

1. Adams ME, Atkinson MH, Lussier AJ, Schulz JI, Siminovitch KA, Wade JP, et al. The role of viscosupplementation with hylan G-F 20 (Synvisc) in the treatment of osteoarthritis of the knee: a Canadian multicenter trial comparing hylan G-F 20 alone, hylan G-F 20 with non-steroidal anti-inflammatory drugs (NSAIDs) and NSAIDs alone. *Osteoarthritis Cartilage*. 1995; 3: 213-25.
2. Ahmad HS, Farrag SE, Okasha AE, Kadry AO, Ata TB, Monir AA, et al. Clinical outcomes are associated with changes in ultrasonographic structural appearance after platelet-rich plasma treatment for knee osteoarthritis. *Int J Rheum Dis*. 2018; 21: 960-6.
3. Ardic F, Bolulu D, Topuz OCubukcu S. Efficacy of intra-articular hyaluronic acid injections in knee osteoarthritis [Abstract 75]. *Ann Rheum Dis*. 2001; 60: 232.
4. Askari A, Gholami T, NaghiZadeh MM, Farjam M, Kouhpayeh SAShabafard Z. Hyaluronic acid compared with corticosteroid injections for the treatment of osteoarthritis of the knee: a randomized control trail. *Springerplus*. 2016; 5: 442.
5. Atamaz F, Kirazli YAKkoc Y. A comparison of two different intra-articular hyaluronan drugs and physical therapy in the management of knee osteoarthritis. *Rheumatol Int*. 2006; 26: 873-8.
6. Atay T, Aslan A, Baydar ML, Ceylan B, Baykal BKirdemir V. [The efficacy of low- and high-molecular-weight hyaluronic acid applications after arthroscopic debridement in patients with osteoarthritis of the knee]. *Acta Orthop Traumatol Turc*. 2008; 42: 228-33.
7. Auerbach BMelzer C. [Cross-linked hyaluronic acid in the treatment of osteoarthritis of the knee--results of a prospective randomized trial]. *Zentralbl Chir*. 2002; 127: 895-9.



8. Bao X, Tan JW, Flyzik M, Ma XC, Liu H, Liu HY. Effect of therapeutic exercise on knee osteoarthritis after intra-articular injection of botulinum toxin type A, hyaluronate or saline: A randomized controlled trial. *J Rehabil Med.* 2018; 50: 534-41.
9. Bayramoglu M, Karatas M, Cetin N, Akman N, Sozay SDilek A. Comparison of two different viscosupplements in knee osteoarthritis -- a pilot study. *Clin Rheumatol.* 2003; 22: 118-22.
10. Bellamy N, Bell MJ, Goldsmith CH, Pericak D, Walker V, Raynauld JP, et al. The effectiveness of hylan G-F 20 in patients with knee osteoarthritis: an application of two sets of response criteria developed by the OARSI and one set developed by OMERACT-OARSI. *Osteoarthritis Cartilage.* 2005; 13: 104-10.
11. Bellamy N, Bell MJ, Goldsmith CH, Pericak D, Walker V, Raynauld JP, et al. Evaluation of WOMAC 20, 50, 70 response criteria in patients treated with hylan G-F 20 for knee osteoarthritis. *Ann Rheum Dis.* 2005; 64: 881-5.
12. Berenbaum F, Grifka J, Cazzaniga S, D'Amato M, Giacobelli G, Chevalier X, et al. A randomised, double-blind, controlled trial comparing two intra-articular hyaluronic acid preparations differing by their molecular weight in symptomatic knee osteoarthritis. *Ann Rheum Dis.* 2012; 71: 1454-60.
13. Bisicchia S, Bernardi G, Tudisco C. HYADD 4 versus methylprednisolone acetate in symptomatic knee osteoarthritis: a single-centre single blind prospective randomised controlled clinical study with 1-year follow-up. *Clin Exp Rheumatol.* 2016; 34: 857-63.
14. Blanco FJ, Fernandez-Sueiro JL, Pinto-Tasende JC, Fernandez-Lopez JC, Ramallal M, Freire A, et al. Intra-articular hyaluronan treatment of patients with knee osteoarthritis waiting for replacement surgery. *The Open Arthritis Journal.* 2008; 1: 1-7.

15. Bragantini A, Cassini M, de Bastiani G, Perbellini A. Controlled single-blind trial of intra-articularly injected hyaluronic acid (Hyalgan®\*) in osteo-arthritis of the knee. *Clinical Trials Journal*. 1987; 24: 333-40.
16. Buendia-Lopez D, Medina-Quiros M, Fernandez-Villacanas Marin MA. Clinical and radiographic comparison of a single LP-PRP injection, a single hyaluronic acid injection and daily NSAID administration with a 52-week follow-up: a randomized controlled trial. *J Orthop Traumatol*. 2018; 19: 3.
17. Bunyaratavej N, Chan KM, Subramanian N. Treatment of painful osteoarthritis of the knee with hyaluronic acid. Results of a multicenter Asian study. *J Med Assoc Thai*. 2001; 84 Suppl 2: S576-81.
18. Butun B, Kacar C, Evcik D. Intra-articular injection of sodium hyaluronate in the treatment of knee osteoarthritis. *Archives of Rheumatology*. 2002; 17: 31-8.
19. Caborn D, Rush J, Lanzer W, Parenti D, Murray C. A randomized, single-blind comparison of the efficacy and tolerability of hylan G-F 20 and triamcinolone hexacetonide in patients with osteoarthritis of the knee. *J Rheumatol*. 2004; 31: 333-43.
20. Campos ALS, RSP EA, da Silva EB, Fayad SG, Acerbi LD, de Almeida FN, et al. Viscosupplementation in patients with severe osteoarthritis of the knee: six month follow-up of a randomized, double-blind clinical trial. *Int Orthop*. 2017; 41: 2273-80.
21. Caracuel MA, Muñoz-Villanueva MC, Escudero A, Veroz R, Frias G, Vacas J. Effects of joint lavage and hyaluronic acid infiltration in patients with osteoarthritis of the knee. *Ann Rheum Dis*. 2001; 60: 236.
22. Carrabba M, Paresce E, Angelini M, Re KA, Torchiana E, Perbellini A. The safety and efficacy of different dose schedules of hyaluronic acid in the treatment of painful

- osteoarthritis of the knee with joint effusion. *European Journal of Rheumatology and Inflammation*. 1995; 15: 25-31.
23. Chou CW, Lue KH, Lee HS, Lin RCLu KH. Hylan G-F 20 has better pain relief and cost-effectiveness than sodium hyaluronate in treating early osteoarthritic knees in Taiwan. *J Formos Med Assoc*. 2009; 108: 663-72.
  24. Cogalgil SHatipoglu F. The effects of intra-articular sodium-hyaluronan in patients with gonarthrosis treated with physical therapy [Abstract 282]. *European League Against Rheumatism, 3rd Annual European Congress of Rheumatology*. Stockholm, Sweden 2002.
  25. Cohen MA, Shiroky JB, Ballachey ML, Neville CESdaile JM. Doubleblind randomized trial of intra-articular (I/A) hyaluronate in the treatment of osteoarthritis of the knee *Arthritis and Rheumatism*. 1994; 37: R31.
  26. Cole BJ, Karas V, Hussey K, Pilz KFortier LA. Hyaluronic Acid Versus Platelet-Rich Plasma: A Prospective, Double-Blind Randomized Controlled Trial Comparing Clinical Outcomes and Effects on Intra-articular Biology for the Treatment of Knee Osteoarthritis. *Am J Sports Med*. 2017; 45: 339-46.
  27. Conrozier T, Jerosch J, Beks P, Kemper F, Euller-Ziegler L, Bailleul F, et al. Prospective, multi-centre, randomised evaluation of the safety and efficacy of five dosing regimens of viscosupplementation with hylan G-F 20 in patients with symptomatic tibio-femoral osteoarthritis: a pilot study. *Arch Orthop Trauma Surg*. 2009; 129: 417-23.
  28. Conrozier T, Eymard F, Afif N, Balblanc JC, Legre-Boyer V, Chevalier X, et al. Safety and efficacy of intra-articular injections of a combination of hyaluronic acid and mannitol (HAnOX-M) in patients with symptomatic knee osteoarthritis: Results of a double-blind, controlled, multicenter, randomized trial. *Knee*. 2016; 23: 842-8.

29. Corrado EM, Peluso GF, Gigliotti STajana GF. The effects of intra-articular administration of hyaluronic acid on osteoarthritis of the knee: a clinical study with immunological and biochemical evaluations. *European Journal of Rheumatology and Inflammation*. 1995; 15: 47-56.
30. Creamer P, Sharif M, George E, Meadows K, Cushnaghan J, Shinmei M, et al. Intra-articular hyaluronic acid in osteoarthritis of the knee: an investigation into mechanisms of action. *Osteoarthritis Cartilage*. 1994; 2: 133-40.
31. Cubukcu D, Ardic F, Karabulut NTopuz O. Hylan G-F 20 efficacy on articular cartilage quality in patients with knee osteoarthritis: clinical and MRI assessment. *Clin Rheumatol*. 2005; 24: 336-41.
32. Dahlberg L, Lohmander LSRyd L. Intraarticular injections of hyaluronan in patients with cartilage abnormalities and knee pain. A one-year double-blind, placebo-controlled study. *Arthritis Rheum*. 1994; 37: 521-8.
33. Dallari D, Sabbioni G, Del Piccolo N, Carubbi C, Veronesi F, Torricelli P, et al. Efficacy of Intra-articular Polynucleotides Associated With Hyaluronic Acid Versus Hyaluronic Acid Alone in the Treatment of Knee Osteoarthritis: A Randomized, Double-Blind, Controlled Clinical Trial. *Clin J Sport Med*. 2018.
34. DeCaria JE, Montero-Odasso M, Wolfe D, Chesworth BMPetrella RJ. The effect of intra-articular hyaluronic acid treatment on gait velocity in older knee osteoarthritis patients: a randomized, controlled study. *Arch Gerontol Geriatr*. 2012; 55: 310-5.
35. Di Martino A, Tentoni F, Di Matteo B, Cavicchioli A, Lo Presti M, Filardo G, et al. Early Viscosupplementation After Anterior Cruciate Ligament Reconstruction: A Randomized Controlled Trial. *Am J Sports Med*. 2016; 44: 2572-8.

36. Dickson DJ, Hosie G, English JR. A double-blind, placebo-controlled comparison of hylan G-F 20 against diclofenac in knee osteoarthritis. *Journal of Clinical Research*. 2001; 4: 41-52.
37. Diracoglu D, Vural M, Baskent A, Dikici F, Aksoy C. The effect of viscosupplementation on neuromuscular control of the knee in patients with osteoarthritis. *J Back Musculoskelet Rehabil*. 2009; 22: 1-9.
38. Erturk C, Altay MA, Altay N, Kalender A, M Ozturk IA. Will a single periarticular lidocaine-corticosteroid injection improve the clinical efficacy of intraarticular hyaluronic acid treatment of symptomatic knee osteoarthritis? *Knee Surg Sports Traumatol Arthrosc*. 2016; 24: 3653-60.
39. Estades-Rubio FJ, Reyes-Martin A, Morales-Marcos V, Garcia-Piriz M, Garcia-Vera JJ, Peran M, et al. Knee Viscosupplementation: Cost-Effectiveness Analysis between Stabilized Hyaluronic Acid in a Single Injection versus Five Injections of Standard Hyaluronic Acid. *Int J Mol Sci*. 2017; 18.
40. Filardo G, Di Matteo B, Tentoni F, Cavicchioli A, Di Martino A, Lo Presti M, et al. No Effects of Early Viscosupplementation After Arthroscopic Partial Meniscectomy: A Randomized Controlled Trial. *Am J Sports Med*. 2016; 44: 3119-25.
41. Forster MC, Straw R. A prospective randomised trial comparing intra-articular Hyalgan injection and arthroscopic washout for knee osteoarthritis. *Knee*. 2003; 10: 291-3.
42. Frizziero L, Ronchetti IP. Intra-articular treatment of osteoarthritis of the knee: an arthroscopic and clinical comparison between sodium hyaluronate (500-730 kDa) and methylprednisolone acetate. *J Orthopaed Traumatol*. 2002; 3: 89-96.

43. Ghirardini M, Betelemme LFatti F. Impiego intraarticolare di acido ialuronico estrattivo de orgoteina sia separatamente che in associazione in pazienti affetti da gonartrosi in fase sinovitica *Reumatismo*. 1990; 42: 132.
44. Gigis I, Fotiadis E, Nenopoulos A, Tsitas KHatzokos I. Comparison of two different molecular weight intra-articular injections of hyaluronic acid for the treatment of knee osteoarthritis. *Hippokratia*. 2016; 20: 26-31.
45. Giarratana LS, Marelli BM, Crapanzano C, De Martinis SE, Gala L, Ferraro M, et al. A randomized double-blind clinical trial on the treatment of knee osteoarthritis: the efficacy of polynucleotides compared to standard hyaluronian viscosupplementation. *Knee*. 2014; 21: 661-8.
46. Graf J, Neusel E, Schneider ENiethard FU. Intra-articular treatment with hyaluronic acid in osteoarthritis of the knee joint: a controlled clinical trial versus mucopolysaccharide polysulfuric acid ester. *Clin Exp Rheumatol*. 1993; 11: 367-72.
47. Grecomoro G, Martorana UDi Marco C. Intra-articular treatment with sodium hyaluronate in gonarthrosis: a controlled clinical trial versus placebo. *Pharmatherapeutica*. 1987; 5: 137-41.
48. Groppa LGMoshneaga M. Studying of the efficiency of the synvisk in osteoartrosis. *Ann Rheum Dis*. 2001; 60: 230.
49. Guler M, Kuran B, Parlar D, Guler M, Saglam HYapici S. Clinical trial of intra-articular injection of hyaluronic acid in patients with osteoarthritis of the knee. *X National Rheumatology Congress*. Pamukkale-Denizli, Turkey1996.
50. Guo Y, Yang PLiu L. Origin and Efficacy of Hyaluronan Injections in Knee Osteoarthritis: Randomized, Double-Blind Trial. *Med Sci Monit*. 2018; 24: 4728-37.

51. Heybeli N, Doral MN, Atay OA, Leblebicioglu GUzumcugil A. [Intra-articular sodium hyaluronate injections after arthroscopic debridement for osteoarthritis of the knee: a prospective, randomized, controlled study]. *Acta Orthop Traumatol Turc.* 2008; 42: 221-7.
52. Hizmetli S, Kocagil S, Kaptanoglu E, Elden HNacitarhan V. The efficacy and safety of intra-articular hyaluronic acid in osteoarthritis of the knee: a prospective, double-blind trial. *European League Against Rheumatism, 3rd Annual European Congress of Rheumatology.* Stockholm, Sweden2002.
53. Houseman L, Arden N, Schnitzer TJ, Birbara C, Conrozier T, Skrepnik N, et al. Intra-articular hylastan versus steroid for knee osteoarthritis. *Knee Surg Sports Traumatol Arthrosc.* 2014; 22: 1684-92.
54. Huang MH, Yang RC, Lee CL, Chen TWWang MC. Preliminary results of integrated therapy for patients with knee osteoarthritis. *Arthritis Rheum.* 2005; 53: 812-20.
55. Ishijima M, Nakamura T, Shimizu K, Hayashi K, Kikuchi H, Soen S, et al. Intra-articular hyaluronic acid injection versus oral non-steroidal anti-inflammatory drug for the treatment of knee osteoarthritis: a multi-center, randomized, open-label, non-inferiority trial. *Arthritis Res Ther.* 2014; 16: R18.
56. Jones AC, Patrick M, Doherty SDoherty M. Intra-articular hyaluronic acid compared to intra-articular triamcinolone hexacetonide in inflammatory knee osteoarthritis. *Osteoarthritis Cartilage.* 1995; 3: 269-73.
57. Jubb RW, Piva S, Beinat L, Dacre JGishen P. A one-year, randomised, placebo (saline) controlled clinical trial of 500-730 kDa sodium hyaluronate (Hyalgan) on the radiological change in osteoarthritis of the knee. *Int J Clin Pract.* 2003; 57: 467-74.

58. Juni P, Reichenbach S, Trelle S, Tschannen B, Wandel S, Jordi B, et al. Efficacy and safety of intraarticular hylan or hyaluronic acids for osteoarthritis of the knee: a randomized controlled trial. *Arthritis Rheum.* 2007; 56: 3610-9.
59. Kahan A, Lleu PLSalin L. Prospective randomized study comparing the medicoeconomic benefits of Hylan GF-20 vs. conventional treatment in knee osteoarthritis. *Joint Bone Spine.* 2003; 70: 276-81.
60. Kalay S. The effectiveness of intra-articular hyaluronic acid treatment in primary gonarthrosis. Ankara, Turkey: Ministry of Health, Republic of Turkey, 1997.
61. Kalman DS, Heimer M, Valdeon A, Schwartz HSheldon E. Effect of a natural extract of chicken combs with a high content of hyaluronic acid (Hyal-Joint) on pain relief and quality of life in subjects with knee osteoarthritis: a pilot randomized double-blind placebo-controlled trial. *Nutr J.* 2008; 7: 3.
62. Kaplunov OA, Biriukov SNBersanov VK. [Use of prolonged corticosteroids and hyaluronic acid salts in treatment of gonarthrosis]. *Khirurgiia (Mosk).* 2015: 58-62.
63. Karatosun V, Unver B, Gocen ZSen A. Comparison of two hyaluronan drugs in patients with advanced osteoarthritis of the knee. A prospective, randomized, double-blind study with long term follow-up. *Clin Exp Rheumatol.* 2005; 23: 213-8.
64. Karatosun V, Unver B, Gocen Z, Sen AGunal I. Intra-articular hyaluronic acid compared with progressive knee exercises in osteoarthritis of the knee: a prospective randomized trial with long-term follow-up. *Rheumatol Int.* 2006; 26: 277-84.
65. Kawasaki T, Kurosawa H, Ikeda H, Takazawa Y, Ishijima M, Kubota M, et al. Therapeutic home exercise versus intraarticular hyaluronate injection for osteoarthritis of



- the knee: 6-month prospective randomized open-labeled trial. *J Orthop Sci.* 2009; 14: 182-91.
66. Khanasuk Y, Dechmaneenin T, Tanavalee A. Prospective randomized trial comparing the efficacy of single 6-ml injection of hylan G-F 20 and hyaluronic acid for primary knee arthritis: a preliminary study. *J Med Assoc Thai.* 2012; 95 Suppl 10: S92-7.
67. Kianmehr N, Hasanzadeh A, Naderi F, Khajoei SH, Haghighi A. A randomized blinded comparative study of clinical response to surface anatomy guided injection versus sonography guided injection of hyaluronic acid in patients with primary knee osteoarthritis. *Int J Rheum Dis.* 2018; 21: 134-9.
68. Kirchner M, Marshall D. A double-blind randomized controlled trial comparing alternate forms of high molecular weight hyaluronan for the treatment of osteoarthritis of the knee. *Osteoarthritis Cartilage.* 2006; 14: 154-62.
69. Kotevoglou N, Iyibozkurt PC, Hiz O, Toktas HK, Kuran B. A prospective randomised controlled clinical trial comparing the efficacy of different molecular weight hyaluronan solutions in the treatment of knee osteoarthritis. *Rheumatol Int.* 2006; 26: 325-30.
70. Kul-Panza E, Berker N. Is hyaluronate sodium effective in the management of knee osteoarthritis? A placebo-controlled double-blind study. *Minerva Med.* 2010; 101: 63-72.
71. Lamo-Espinosa JM, Mora G, Blanco JF, Granero-Molto F, Nunez-Cordoba JM, Sanchez-Echenique C, et al. Intra-articular injection of two different doses of autologous bone marrow mesenchymal stem cells versus hyaluronic acid in the treatment of knee osteoarthritis: multicenter randomized controlled clinical trial (phase I/II). *J Transl Med.* 2016; 14: 246.

72. Lamo-Espinosa JM, Mora G, Blanco JF, Granero-Molto F, Nunez-Cordoba JM, Lopez-Elio S, et al. Intra-articular injection of two different doses of autologous bone marrow mesenchymal stem cells versus hyaluronic acid in the treatment of knee osteoarthritis: long-term follow up of a multicenter randomized controlled clinical trial (phase I/II). *J Transl Med.* 2018; 16: 213.
73. Leardini G, Franceschini M, Mattara L, Bruno RPerbellini A. Intraarticular sodium hyaluronate (Hyalgan) in gonarthrosis - a controlled-study comparing methylprednisolone acetate. *Clinical Trials Journal.* 1987; 24: 341-50.
74. Leardini G, Mattara L, Franceschini MPerbellini A. Intra-articular treatment of knee osteoarthritis. A comparative study between hyaluronic acid and 6-methyl prednisolone acetate. *Clin Exp Rheumatol.* 1991; 9: 375-81.
75. Leighton R, Akermark C, Therrien R, Richardson JB, Andersson M, Todman MG, et al. NASHA hyaluronic acid vs. methylprednisolone for knee osteoarthritis: a prospective, multi-centre, randomized, non-inferiority trial. *Osteoarthritis Cartilage.* 2014; 22: 17-25.
76. Leopold SS, Redd BB, Warne WJ, Wehrle PA, Pettis PDS, Shott S. Corticosteroid compared with hyaluronic acid injections for the treatment of osteoarthritis of the knee. A prospective, randomized trial. *J Bone Joint Surg Am.* 2003; 85-A: 1197-203.
77. Lisi C, Perotti C, Scudeller L, Sammarchi L, Dametti F, Musella V, et al. Treatment of knee osteoarthritis: platelet-derived growth factors vs. hyaluronic acid. A randomized controlled trial. *Clin Rehabil.* 2018; 32: 330-9.
78. Listrat V, Ayral X, Patarnello F, Bonvarlet JP, Simonnet J, Amor B, et al. Arthroscopic evaluation of potential structure modifying activity of hyaluronan (Hyalgan) in osteoarthritis of the knee. *Osteoarthritis Cartilage.* 1997; 5: 153-60.

79. Louis ML, Magalon J, Jouve E, Bornet CE, Mattei JC, Chagnaud C, et al. Growth Factors Levels Determine Efficacy of Platelets Rich Plasma Injection in Knee Osteoarthritis: A Randomized Double Blind Noninferiority Trial Compared With Viscosupplementation. *Arthroscopy*. 2018; 34: 1530-40 e2.
80. McDonald C, Hantel S, Strohmeier M. A randomised, controlled study to compare the performance and safety of two sources of sodium hyaluronate given as a viscosupplement by intra-articular injection to patients with osteoarthritis of the knee. *Journal of Clinical Research*. 2000; 3: 41-50.
81. Miltner O, Schneider U, Siebert CH, Niedhart C, Niethard FU. Efficacy of intraarticular hyaluronic acid in patients with osteoarthritis--a prospective clinical trial. *Osteoarthritis Cartilage*. 2002; 10: 680-6.
82. Navarro-Sarabia F, Coronel P, Collantes E, Navarro FJ, de la Serna AR, Naranjo A, et al. A 40-month multicentre, randomised placebo-controlled study to assess the efficacy and carry-over effect of repeated intra-articular injections of hyaluronic acid in knee osteoarthritis: the AMELIA project. *Ann Rheum Dis*. 2011; 70: 1957-62.
83. Ozturk C, Atamaz F, Hepguler S, Argin M, Arkun R. The safety and efficacy of intraarticular hyaluronan with/without corticosteroid in knee osteoarthritis: 1-year, single-blind, randomized study. *Rheumatol Int*. 2006; 26: 314-9.
84. Pavelka K, Uebelhart D. Efficacy evaluation of highly purified intra-articular hyaluronic acid (Sinovial((R))) vs hylan G-F20 (Synvisc((R))) in the treatment of symptomatic knee osteoarthritis. A double-blind, controlled, randomized, parallel-group non-inferiority study. *Osteoarthritis Cartilage*. 2011; 19: 1294-300.

85. Payne MW, Petrella RJ. Viscosupplementation effect on proprioception in the osteoarthritic knee. *Arch Phys Med Rehabil.* 2000; 81: 598-603.
86. Pedersen PB. Intra-articular hyaluronic acid (HA) in the treatment of osteoarthritis (OA) of the knee. *Osteoarthritis and Cartilage.* 1993; 1: 70.
87. Petrella RJ, Wolfe D, Chesworth B, Shapiro S, Montero-Odasso M. . The effect of hyaluronic acid on gait in knee osteoarthritis patients: preliminary results for a randomized, double-blind, placebo controlled study [Abstract 375]. *Ann Rheum Dis.* 2009; 68: 479.
88. Pham T, Le Henanff A, Ravaud P, Dieppe P, Paolozzi L, Dougados M. Evaluation of the symptomatic and structural efficacy of a new hyaluronic acid compound, NRD101, in comparison with diacerein and placebo in a 1 year randomised controlled study in symptomatic knee osteoarthritis. *Ann Rheum Dis.* 2004; 63: 1611-7.
89. Raeissadat SA, Rayegani SM, Forogh B, Hassan Abadi P, Moridnia MR, Rahimi Dehgolan S. Intra-articular ozone or hyaluronic acid injection: Which one is superior in patients with knee osteoarthritis? A 6-month randomized clinical trial. *J Pain Res.* 2018; 11: 111-7.
90. Raman R, Dutta A, Day N, Sharma HK, Shaw CJ, Johnson GV. Efficacy of Hylan G-F 20 and Sodium Hyaluronate in the treatment of osteoarthritis of the knee -- a prospective randomized clinical trial. *Knee.* 2008; 15: 318-24.
91. Raynauld JP, Torrance GW, Band PA, Goldsmith CH, Tugwell P, Walker V, et al. A prospective, randomized, pragmatic, health outcomes trial evaluating the incorporation of hylan G-F 20 into the treatment paradigm for patients with knee osteoarthritis (Part 1 of 2): clinical results. *Osteoarthritis Cartilage.* 2002; 10: 506-17.

92. Raynauld JP, Goldsmith CH, Bellamy N, Torrance GW, Polisson R, Belovich D, et al. Effectiveness and safety of repeat courses of hylan G-F 20 in patients with knee osteoarthritis. *Osteoarthritis Cartilage*. 2005; 13: 111-9.
93. Renklitepe N, Atalay E. The effect of intra-articular sodium hyaluronate therapy in knee osteoarthritis. *Ann Rheum Dis*. 2000; 59: 142.
94. Roman JA, Chismol J, Morales M, Donderis JL. Intra-articular treatment with hyaluronic acid. Comparative study of Hyalgan and Adant. *Clin Rheumatol*. 2000; 19: 204-6.
95. Sala S, Miguel RE. Intra-articular hyaluronic acid in the treatment of osteoarthritis of the knee: a short term study. *Eur J Rheum Inflammation*. 1995; 15: 33-8.
96. ClinicalTrials.gov. TREAD-20 Extension - Treatment of knee pain due to osteoarthritis. 2009.
97. Scale D, Wobig M, Wolpert W. Viscosupplementation of osteoarthritic knees with hylan: a treatment schedule study. *Current Therapeutic Research*. 1994; 55: 220-32.
98. Schauss AG, Stenehjem J, Park J, Endres J, Clewell A. Effect of the novel low molecular weight hydrolyzed chicken sternal cartilage extract, BioCell Collagen, on improving osteoarthritis-related symptoms: a randomized, double-blind, placebo-controlled trial. *J Agric Food Chem*. 2012; 60: 4096-101.
99. Schneider U, Miltner O, Graf J, Thomsen M, Niethard FU. The efficacy of hyaluronic acid in patients with osteoarthritis of both knees in right/left comparison - examination with dynamometry, synovial oxygen, partial pressure, intraarticular temperature and Luquesne-score. *Z Orthop*. 1997; 135: 341-7.
100. Administration FaD. Summary of Safety and Effectiveness Data: Gel-One. 2011.

101. Sezgin M, Demirel AC, Karaca C, Ortancil O, Ulkar GB, Kanik A, et al. Does hyaluronan affect inflammatory cytokines in knee osteoarthritis? *Rheumatol Int.* 2005; 25: 264-9.
102. Shimizu M, Higuchi H, Takagishi K, Shinozaki TKobayashi T. Clinical and biochemical characteristics after intra-articular injection for the treatment of osteoarthritis of the knee: prospective randomized study of sodium hyaluronate and corticosteroid. *J Orthop Sci.* 2010; 15: 51-6.
103. Skwara A, Peterlein CD, Tibesku CO, Rosenbaum DFuchs-Winkelmann S. Changes of gait patterns and muscle activity after intraarticular treatment of patients with osteoarthritis of the knee: a prospective, randomised, doubleblind study. *Knee.* 2009; 16: 466-72.
104. Skwara A, Ponelis R, Tibesku CO, Rosenbaum DFuchs-Winkelmann S. Gait patterns after intraarticular treatment of patients with osteoarthritis of the knee--hyaluronan versus triamcinolone: a prospective, randomized, doubleblind, monocentric study. *Eur J Med Res.* 2009; 14: 157-64.
105. Strand V, Lim STakamura J. Evidence for safety of retreatment with a single intra-articular injection of Gel-200 for treatment of osteoarthritis of the knee from the double-blind pivotal and open-label retreatment clinical trials. *BMC Musculoskelet Disord.* 2016; 17: 240.
106. Su K, Bai Y, Wang J, Zhang H, Liu HMa S. Comparison of hyaluronic acid and PRP intra-articular injection with combined intra-articular and intraosseous PRP injections to treat patients with knee osteoarthritis. *Clin Rheumatol.* 2018; 37: 1341-50.

107. Sun SF, Hsu CW, Lin HS, Liou IH, Chen YHHung CL. Comparison of Single Intra-Articular Injection of Novel Hyaluronan (HYA-JOINT Plus) with Synvisc-One for Knee Osteoarthritis: A Randomized, Controlled, Double-Blind Trial of Efficacy and Safety. *J Bone Joint Surg Am.* 2017; 99: 462-71.
108. Suppan VKL, Wei CY, Siong TC, Mei TM, Chern WB, Nanta Kumar VK, et al. Randomized controlled trial comparing efficacy of conventional and new single larger dose of intra-articular viscosupplementation in management of knee osteoarthritis. *J Orthop Surg (Hong Kong).* 2017; 25: 2309499017731627.
109. Tamir E, Robinson D, Koren R, Agar GHalperin N. Intra-articular hyaluronan injections for the treatment of osteoarthritis of the knee: a randomized, double blind, placebo controlled study. *Clin Exp Rheumatol.* 2001; 19: 265-70.
110. Tammachote N, Kanitnate S, Yakumpor TPanichkul P. Intra-Articular, Single-Shot Hylan G-F 20 Hyaluronic Acid Injection Compared with Corticosteroid in Knee Osteoarthritis: A Double-Blind, Randomized Controlled Trial. *J Bone Joint Surg Am.* 2016; 98: 885-92.
111. Tasciotaoglu FOner C. Efficacy of intra-articular sodium hyaluronate in the treatment of knee osteoarthritis. *Clin Rheumatol.* 2003; 22: 112-7.
112. Tekeoglu I, Adak B, Goksoy TTosun N. Effects of intra-articular injections of sodium hyaluronate (Orthovisc) and betamethasone on osteoarthritis of the knee. *Journal of Rheumatology and Rehabilitation.* 1998; 9: 220-4.
113. Tetik S, Ones KTetik C. Efficacy of intra-articular Hylan G-F 20 on osteoarthritis of the knee. *The Pain Clinic.* 2003; 15: 459-66.

114. Toda Y, Tsukimura N. A comparison of intra-articular hyaluronan injection accuracy rates between three approaches based on radiographic severity of knee osteoarthritis. *Osteoarthritis Cartilage*. 2008; 16: 980-5.
115. Torrance GW, Raynauld JP, Walker V, Goldsmith CH, Bellamy N, Band PA, et al. A prospective, randomized, pragmatic, health outcomes trial evaluating the incorporation of hylan G-F 20 into the treatment paradigm for patients with knee osteoarthritis (Part 2 of 2): economic results. *Osteoarthritis Cartilage*. 2002; 10: 518-27.
116. Trueba Vasavilbaso C, Rosas Bello CD, Medina Lopez E, Coronel Granado MP, Navarrete Alvarez JM, Trueba Davalillo CA, et al. Benefits of different postoperative treatments in patients undergoing knee arthroscopic debridement. *Open Access Rheumatol*. 2017; 9: 171-9.
117. Tsai C-L, Chang C-C, Chen S-C, Beinat LP, Piva S. Treatment of knee osteoarthritis in Asian population with an intra-articular hyaluronan of MW 500-730 KDa. *Osteoarthritis and Cartilage*. 2003; 11: S119.
118. Vaishya R, Pandit R, Agarwal AK, Vijay V. Intra-articular hyaluronic acid is superior to steroids in knee osteoarthritis: A comparative, randomized study. *J Clin Orthop Trauma*. 2017; 8: 85-8.
119. Wang SZ, Wu DY, Chang Q, Guo YD, Wang CF, Fan WM. Intra-articular, single-shot co-injection of hyaluronic acid and corticosteroids in knee osteoarthritis: A randomized controlled trial. *Exp Ther Med*. 2018; 16: 1928-34.
120. Wang J. Efficacy and safety of adalimumab by intra-articular injection for moderate to severe knee osteoarthritis: An open-label randomized controlled trial. *J Int Med Res*. 2018; 46: 326-34.



121. Westrich G, Schaefer S, Walcott-Sapp S, Lyman S. Randomized prospective evaluation of adjuvant hyaluronic acid therapy administered after knee arthroscopy. *Am J Orthop (Belle Mead NJ)*. 2009; 38: 612-6.
122. Wu HB, Du JY, Yang SH, Shao ZW, Wu X, Du JY, et al. Evaluation on the effects of hyaluronan combined with different dosages of celecoxib for relieving pain and ankylosis induced by knee osteoarthritis. *Chinese Journal of Clinical Rehabilitation*. 2004; 8: 5491-3.
123. Xin Y, Jianhao L, Tiansheng S, Yongqiang H, Weimin F, Ming C, et al. The efficacy and safety of sodium hyaluronate injection (Adant(R)) in treating degenerative osteoarthritis: a multi-center, randomized, double-blind, positive-drug parallel-controlled and non-inferiority clinical study. *Int J Rheum Dis*. 2016; 19: 271-8.
124. Yu W, Xu P, Huang GLiu L. Clinical therapy of hyaluronic acid combined with platelet-rich plasma for the treatment of knee osteoarthritis. *Exp Ther Med*. 2018; 16: 2119-25.
